# The guidance and adhesion protein FLRT2 dimerizes *in cis* via dual Small-X<sub>3</sub>-Small transmembrane motifs

Verity Jackson<sup>#,1</sup>, Julia Hermann<sup>#,1,6</sup>, Christopher J. Tynan<sup>#,2</sup>, Daniel J. Rolfe<sup>2</sup>, Robin A. Corey<sup>1</sup>, Anna L. Duncan<sup>1</sup>, Maxime Noriega<sup>3</sup>, Amy Chu<sup>1</sup>, Antreas C. Kalli<sup>4</sup>, E. Yvonne Jones<sup>5</sup>, Mark S. P. Sansom<sup>1</sup>, Marisa L. Martin-Fernandez<sup>\*,2</sup>, Elena Seiradake<sup>\*,1</sup>, Matthieu Chavent<sup>\*,3</sup>

## Affiliations

#These authors contributed equally to this study

- 1- Department of Biochemistry, University of Oxford, South Parks Road, Oxford, OX1 5RJ, United Kingdom
- 2- Central Laser Facility, Research Complex at Harwell Science & Technology Facilities Council, Harwell Campus, Didcot, United Kingdom
- 3- Institut de Pharmacologie et Biologie Structurale, IPBS, Université de Toulouse, CNRS, UPS, 205 route de Narbonne, 31400, Toulouse, France
- 4- Department of Discovery and Translational Science, Institute of Cardiovascular and Metabolic Medicine, School of Medicine and Astbury Center for Structural Molecular Biology, University of Leeds, United Kingdom
- 5- Division of Structural Biology, Wellcome Centre for Human Genetics, University of Oxford, Oxford, United Kingdom
- 6- Present address: German Cancer Research Center (DKFZ), Im Neuenheimer Feld 581, 69120 Heidelberg, Germany

\* Correspondence and requests for materials should be addressed to E. S. (email: [elena.seiradake@bioch.ox.ac.uk](mailto:elena.seiradake@bioch.ox.ac.uk)), to M. L. M.F. (email: [marisa.martin-fernandez@stfc.ac.uk](mailto:marisa.martin-fernandez@stfc.ac.uk)), or to M. C. (email: [matthieu.chavent@ipbs.fr](mailto:matthieu.chavent@ipbs.fr))

## Fields

Structural Biology and Biophysics / Computational Biology

## Abstract

Fibronectin Leucine-rich Repeat Transmembrane (FLRT 1-3) proteins are a family of broadly expressed single-spanning transmembrane receptors that play key roles in development. Their extracellular domains mediate homotypic cell-cell adhesion and heterotypic protein interactions with other receptors to regulate cell adhesion and guidance. These *in trans* FLRT interactions determine the formation of signaling complexes of varying complexity and function. Whether FLRTs also interact at the surface of the same cell, *in cis*, remains unknown. Here, molecular dynamics simulations reveal two dimerization motifs in the FLRT2 transmembrane helix. Single particle tracking experiments show that these 'Small-X<sub>3</sub>-Small' motifs synergize with a third dimerization motif encoded in the extracellular domain to permit the *cis* association and co-diffusion patterns of FLRT2 receptors on cells. These results may point to a competitive switching mechanism between *in cis* and *in trans* interactions which suggests that homotypic FLRT interaction mirrors the functionalities of classic adhesion molecules.

41  
42  
43  
44  
45  
46  
47  
48  
49  
50  
51  
52  
53  
54  
55  
56  
57  
58  
59  
60  
61  
62  
63  
64  
65  
66  
67  
68  
69  
70  
71  
72  
73  
74  
75  
76  
77  
78  
79  
80  
81

## Introduction

Fibronectin Leucine-rich Repeat Transmembrane (FLRT) proteins are a family of cell adhesion molecules (CAMs) that are broadly expressed during vertebrate development (Karaulanov et al., 2006; Maretto et al., 2008). FLRTs are unusual CAMs as they perform both cell adhesive and repulsive functions, leading to their definition as Repellent CAMs (ReCAMs) (Seiradake et al., 2014; Yamagishi et al., 2011). In neurons, FLRTs act as repulsive guidance cues during cortical cell migration (Jackson et al., 2015; Yamagishi et al., 2011), where they play a key role in cortical folding (Toro et al., 2017) and as adhesion molecules in synaptic complexes (O'Sullivan et al., 2012; Sando et al., 2019). Adhesive FLRT functions are elicited by homotypic binding (Karaulanov et al., 2006; Maretto et al., 2008) or by binding to the G-protein coupled receptor Latrophilin (Lphn 1-3) (Jackson et al., 2015; Lu et al., 2015; O'Sullivan et al., 2012; Ranaivoson et al., 2015) on opposing cells, while cell repulsion results from interaction with Uncoordinated-5 (Unc5A-D) (Lu et al., 2015; Yamagishi et al., 2011). FLRT also interacts with Unc5 *in cis* to regulate Lphn-mediated adhesion, at least *in vitro* (Jackson et al., 2016). In migrating neurons, FLRT cooperates with the Lphn-binding receptor Teneurin to form a ternary trans-synaptic complex that mediates cell repulsion (Toro et al., 2020), while the three proteins also function in promoting synapsing (Sando et al., 2019). Thus, FLRT acts in a context-dependent manner to determine the formation of different higher order cell-guidance signaling complexes and regulate brain development (Seiradake et al., 2016). Here we ask whether FLRT forms homotypic *cis* complexes and how this may modulate *cis* and *trans* interactions with other partners.

FLRTs share a common architecture (Fig. 1A) beginning with an N-terminal Leucine-Rich Repeat (LRR) extracellular domain, which contains a concave surface on which both FLRT and Lphn bind (Jackson et al., 2015; Seiradake et al., 2014). Unc5 binds to an adjacent surface on the LRR domain, which is compatible at least with Lphn-binding (Jackson et al., 2016). The LRR domain is linked to a type III fibronectin (FN) domain which then leads into the single-spanning transmembrane (TM) domain and a ~100 amino acid long intracellular domain (ICD) of unknown structure. FLRT2 TM domains contain two consecutive "Small-X<sub>3</sub>-Small" motifs (Fig. 1B) which are known to promote receptor interactions *in cis* (Russ and Engelman, 2000; Teese and Langosch, 2015). For example, this motif plays fundamental roles in the signaling mechanisms of epidermal growth factor receptor (EGFR), fibroblast growth factor receptor (FGFR), and EphA receptors (Bocharov et al., 2008; Endres et al., 2013; Sarabipour and Hristova, 2016).

Characterizing the dynamics of membrane protein structure is challenging (Bugge et al., 2016), especially due to the interactions between lipids and proteins (Cymer et al., 2012; Laganowsky et al., 2014; Pliotas et al., 2015; Sonntag et al., 2011). Molecular Dynamics (MD) simulations have recently emerged as powerful tools to study membrane protein interactions (Chavent et al., 2016). In particular, coarse-grained (CG) modelling is a method of choice to explore the association of TM domains (Souza et al., 2021; Wassenaar et al., 2015a) in biological membranes (Corradi et al., 2018; Marrink et al., 2019). Combining MD simulations with experimental assays is now a well-established scientific strategy (Bottaro and Lindorff-Larsen, 2018). Conversely, Single Molecule Tracking (SMT) microscopy (Liu et al., 2016; Stone et al.,

2017) provides the resolution and dynamic insight to validate models of the assembly mechanisms of cell receptors (Wilmes et al., 2020; Zanetti-Domingues et al., 2018).

Here, we use molecular dynamics simulations and live cell SMT experiments to reveal how FLRT2 dimerizes *in cis* via two Small- $X_3$ -Small motifs. Unexpectedly, these motifs work synergistically with the extracellular dimerization motif in the ligand-binding domain (Seiradake et al., 2014) to produce FLRT-FLRT association. The results suggest a bipartite structural mechanism that underlies the diverse functions of FLRT, and a competitive mechanism for *in cis* versus *in trans* binding via the extracellular domain.

## Results

### FLRT2 TM dimerization involves two Small- $X_3$ -Small motifs

As no structural information exists for the FLRT2 TM domain, we have used secondary structure prediction tools (see Methods) to predict the membrane-embedded helical region of FLRT2 (Fig. 1B). We identified 24 residues as the core TM helix (denoted  $TM_{24}$ ). This length is consistent with the average length for a plasma membrane-spanning TM helix (Sharpe et al., 2010). We extended the helical segment with four N- and C-terminal residues, which were modelled as coils (denoted  $TM_{32}$ ).

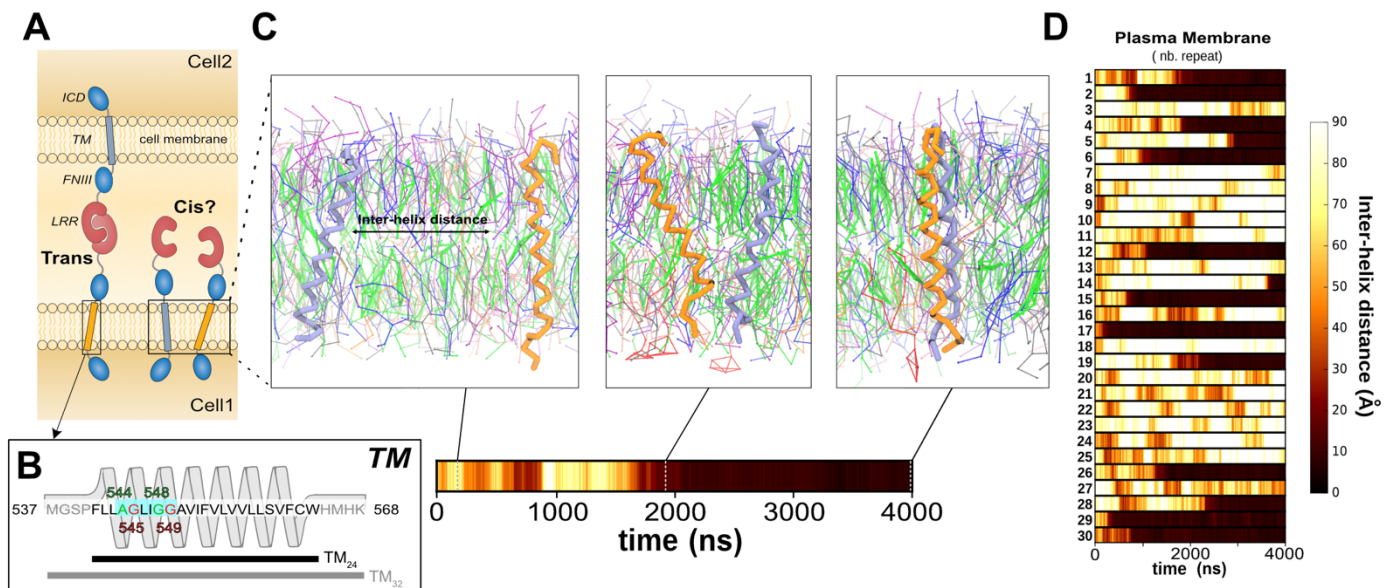

**Fig. 1: Dimerization of FLRT2 TM domains in the plasma membrane.** **A-** Schematic of FLRT proteins engaging *in trans* and potentially also *in cis* interactions. **B-** Sequence of the FLRT2 TM helix. The two Small- $X_3$ -Small motifs, key residues for the formation of the helix/helix interface highlighted by the CG-MD simulations, are colored in green and red. Two constructs were used as inputs for MD simulations: the core TM helix of 24 residues ( $TM_{24}$ ) and an extended version with the four most N- and C-terminal residues ( $TM_{32}$ ). **C-** The CG-MD protocol to assess TM helix interactions. The two helices are positioned 60 Å apart and diffuse freely in the membrane. The colored bars show, for each simulation, the distance between the two TM helices as a function of time. **D-** The TM contact bars of the 30 simulations for the  $TM_{32}$  helices in the plasma membrane constituted of 8 different lipid types (see details in Sup. Fig. 1).

We performed multiple runs of coarse-grained molecular dynamics (CG-MD) (Marrink et

al., 2007; Monticelli et al., 2008) to model the associations of the TM<sub>32</sub> monomers in a membrane model composed of 8 different species of lipids (Sup. Fig. 1) mimicking to some extent the complexity of an average plasma membrane (PM) (Ingólfsson et al., 2020). We positioned the two helices 60 Å apart allowing them to diffuse freely until there is an encounter which mainly leads to the formation of a stable helix dimer (Fig. 1C,D). The helices interacted through a network of residues distributed along each peptide. Among these residues, we identified two consecutive Small-X<sub>3</sub>-Small motifs known to favor TM interactions (Russ and Engelman, 2000; Teese and Langosch, 2015): A<sub>544</sub>-X<sub>3</sub>-G<sub>548</sub> and G<sub>545</sub>-X<sub>3</sub>-G<sub>549</sub> (Fig. 2A).

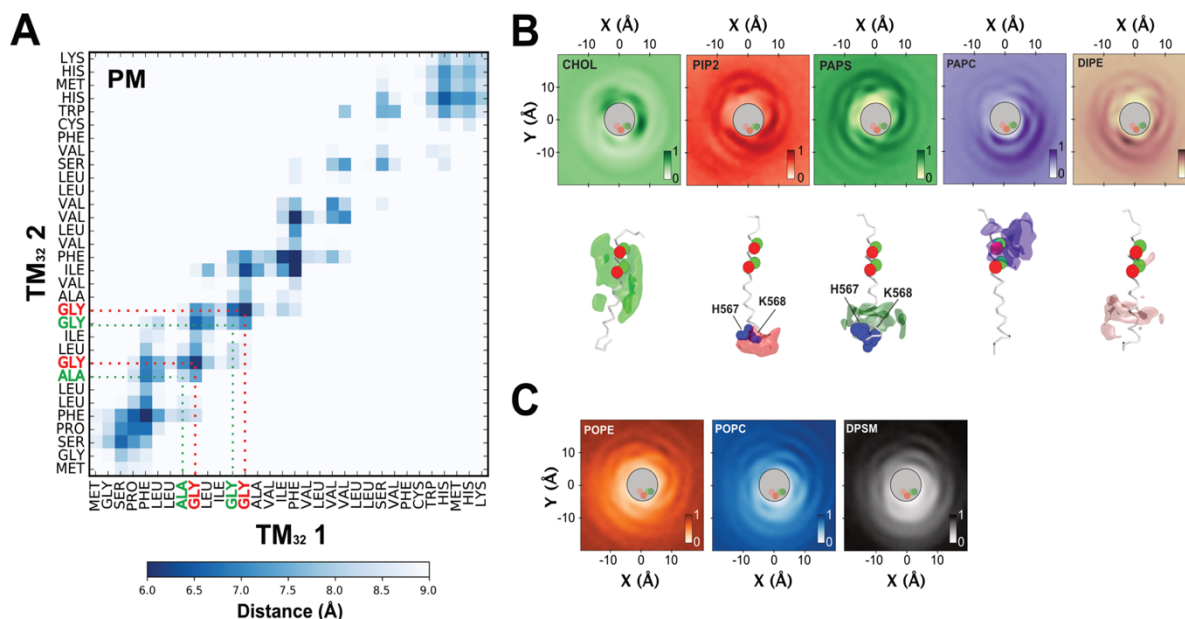

**Fig. 2: FLRT TM dimer interface and lipid fingerprint in the plasma membrane.** A- Averaged TM contact matrix extracted from simulations of TM<sub>32</sub> in plasma membrane (PM) highlighted a TM dimerization via the A<sub>544</sub>-X<sub>3</sub>-G<sub>548</sub> and G<sub>545</sub>-X<sub>3</sub>-G<sub>549</sub> motifs. Two-dimensional lateral density maps, showing local lipid density around one TM domain highlighting favored (B) and depleted lipids (C). For the lipids in the TM vicinity, a three dimensional representation of the lipid density displays a lipid redistribution spread along the whole TM domain.

Based on these simulations, we analyzed the composition of the lipid shell around a TM domain. This revealed preferential association with specific lipids (Fig. 2B): cholesterol, negatively charged lipids (PIP<sub>2</sub> and PS), and highly unsaturated lipids (PAPC: C16:0/20:4, DIPE C16:2/C18:2). Due to the membrane asymmetry, these interactions were spread along the whole TM domain. Conversely, less saturated lipids (POPE and POPC) and sphingomyelin lipid (DPSM) seemed to be depleted from the direct surrounding of the TM domain (Fig. 2C). The interactions between the TM domain and surrounding lipids may create a unique membrane environment (Corradi et al., 2018) which accordingly may influence the dynamics of the TM dimerization.

### FLRT2 TM dimerization is a dynamical process modulated by membrane lipid composition

To assess the role of the membrane composition on the TM dimer dynamics we have



122 defined three types of symmetric membrane: a membrane composed of unsaturated lipids (POPC:  
 123 C16:0/18:1), a membrane composed of saturated lipids (DPPC: C16:0/18:0), and a lipid mixture  
 124 of 80% DPPC and 20% cholesterol. For each composition, we ran multiple runs of coarse-grained  
 125 molecular dynamics (CG-MD) simulations (Sup. Table 1). For the three membrane compositions,  
 126 we mainly observed a dimerization of TM domains (Sup. Fig. 2).

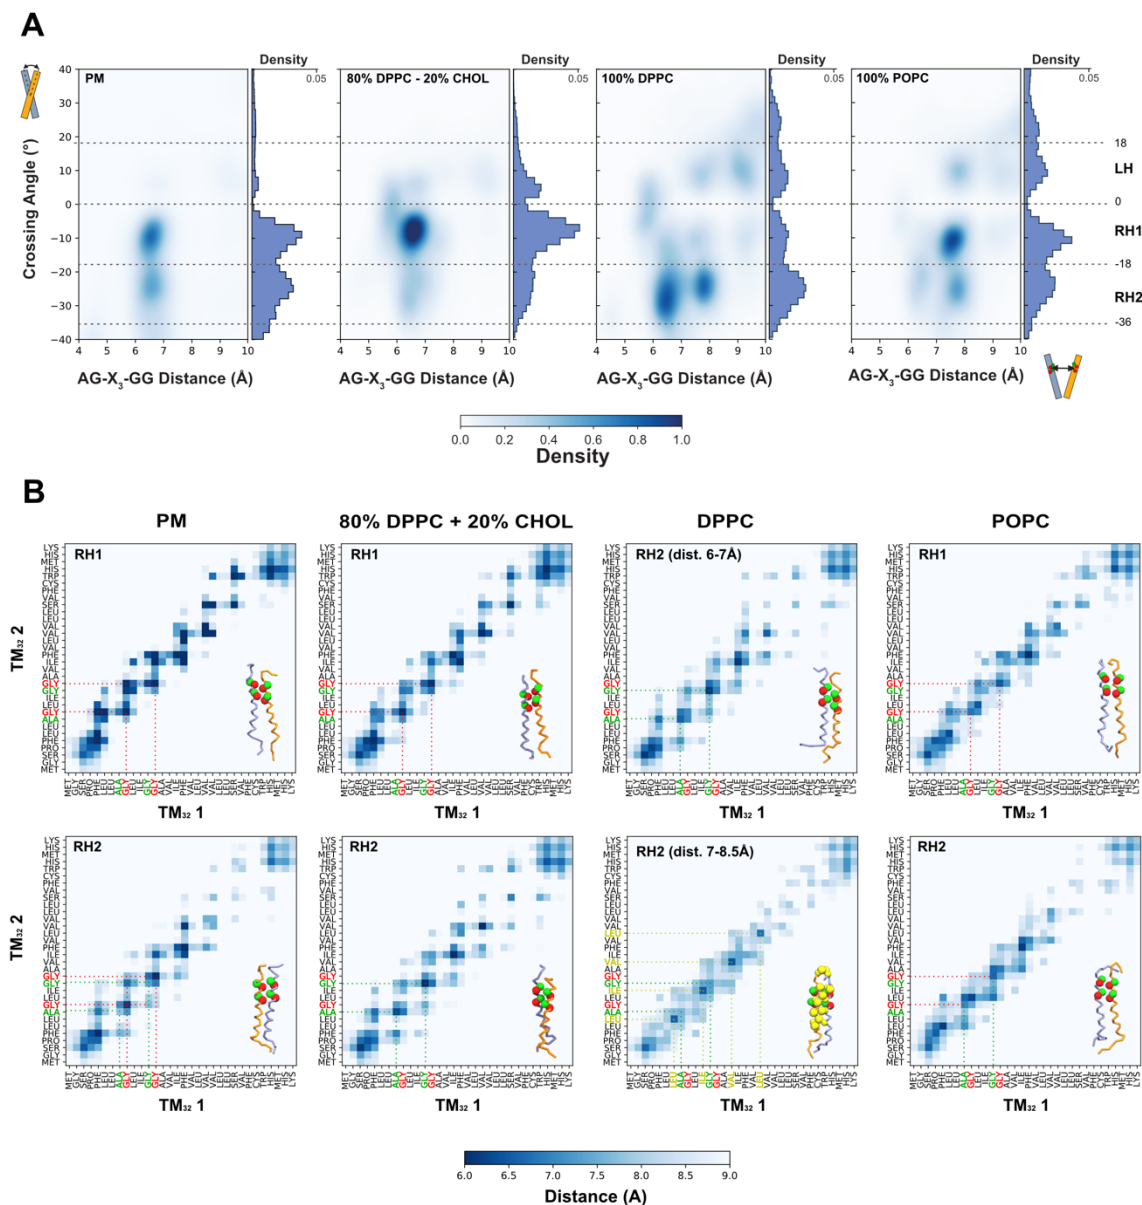

**Fig. 3: TM dimer dynamics modulated by membrane composition.** **A-** TM<sub>32</sub> helix dimer structural populations for different membrane compositions. A positive value for the crossing angle corresponds to a left-handed (LH) dimer, and a negative value to a right-handed (RH) dimer (details for TM<sub>24</sub> systems are presented in Sup. Fig. 5). The CG-MD simulations have highlighted two Right Handed conformations (RH1 and RH2) and one Left Handed (LH). RH1 is defined with a crossing angle between -18° and 0°, RH2 between -36° and -18°, and LH between 0° and 18°. **B-** Averaged TM contact matrix extracted from simulations of TM<sub>32</sub> for the main crossing angle structure in each membrane composition. This highlight the main TM dimerizations via the A<sub>544</sub>-G<sub>548</sub> motif, G<sub>545</sub>-G<sub>549</sub> motif or a combination of both motifs.

128 We then performed crossing angle analysis to assess the geometry of the TM helices  
129 (Chothia et al., 1981; Walters and DeGrado, 2006) for these three lipid compositions as well as for  
130 the PM composition. This revealed three dimer populations (**Fig. 3A, right panel**): two main right-  
131 handed populations with average crossing angles of approximately  $-27^\circ$  (RH1) and  $-9^\circ$  (RH2) and  
132 one minor left-handed population with an average crossing angle of around  $+9^\circ$  (LH). To obtain a  
133 more detailed view of the dynamical TM dimer association, we plotted the helix crossing angle  
134 against the distance between the two Small-X<sub>3</sub>-Small motifs. This revealed several sub-  
135 populations associated with each crossing angle peak (**Fig. 3A, left panel**). Notably, membrane  
136 lipid composition appeared to modulate this dynamical equilibrium. The PM as well as the 80%  
137 DPPC + 20% CHOL compositions favored a RH1 population with a distance between motifs of 6.5  
138 Å. The DPPC membrane allowed a larger diversity of dimer configurations with a slight preference  
139 for two types of RH2 populations, with motif distances around 6.5 Å and 8 Å, but also broad RH1  
140 and LH populations. The POPC membrane appeared to depict crossing-angle populations  
141 equivalent to PM and 80% DPPC + 20% CHOL compositions but with a shift towards larger motif  
142 distances (between 7.5 and 8 Å). Previous studies have shown a fine mechanistic balance  
143 between juxtamembrane regions and TM domains (Arkhipov et al., 2013; Defour et al., 2013;  
144 Tamagaki et al., 2014). To evaluate the effect of the juxtamembrane (JM) regions on the dynamics  
145 of the TM dimer, we performed CG-MD simulations on the TM<sub>24</sub> segment (**Fig. 1B**), for the three  
146 membrane compositions (**Sup. Fig. 4**). Removing the JM regions seemed to shift TM populations  
147 towards smaller motif distances (**Sup. Fig. 5**).

148 For each membrane composition, we examined dimer interfaces associated with the  
149 different crossing angle populations (**Fig. 3B**). These analyzes showed different TM interactions  
150 driven by the interactions of the two Small-X<sub>3</sub>-Small motifs. The interactions through the G<sub>545</sub>-X<sub>3</sub>-  
151 G<sub>549</sub> motif were mostly found in RH1 populations while the A<sub>544</sub>-X<sub>3</sub>-G<sub>548</sub> motif associations were  
152 often related to RH2 populations. In some cases, both motifs interacted together in RH2 (**Fig. 3B**)  
153 or LH populations (**Sup. Fig. 6**). We noticed only few events for which the two Small-X<sub>3</sub>-Small  
154 motifs were not involved (e. g. second RH2 population for POPC membrane in **Fig. 3B**). We then  
155 refined the three main TM configurations seen in our CG-MD simulations (one interaction via A<sub>544</sub>-  
156 X<sub>3</sub>-G<sub>548</sub> motif, one interaction via G<sub>545</sub>-X<sub>3</sub>-G<sub>549</sub>, and one interaction involving both motifs) by  
157 performing 400 ns of atomistic MD simulations (see Methods) (**Sup. Fig. 7**). We converted TM  
158 dimer structures extracted from the DPPC+CHOL membrane because the atomistic models of the  
159 lipids constituting the PM membrane were, to our knowledge, not all parametrized for atomistic  
160 force fields. Furthermore, compared to DPPC and POPC membranes, the TM dimer populations  
161 in the DPPC+CHOL membrane are the most similar to those in the PM membrane (**Fig. 3A**). For  
162 all three structures, the interactions between the Small-X<sub>3</sub>-Small motifs were stable throughout the  
163 simulation (**Sup. Fig. 7-B**). Interestingly, the TM dimer involving both motifs seemed more  
164 dynamic in term of crossing angle than the two other TM structures (**Sup. Fig. 7-B**).

165 Thus, MD simulations revealed a dynamic equilibrium of dimer structures involving the two  
166 consecutives Small-X<sub>3</sub>-Small motifs, A<sub>544</sub>-X<sub>3</sub>-G<sub>548</sub> and G<sub>545</sub>-X<sub>3</sub>-G<sub>549</sub>, which may be modulated by  
167 membrane composition.

## 169 Distinctive mutations in the Small-X<sub>3</sub>-Small motifs selectively modulate FLRT2 TM 170 dimerization

171 To assess the individual contributions of the two Small-X<sub>3</sub>-Small motifs to the dimerization,  
172 we performed CG-MD simulations with several mutants replacing glycine residues with isoleucine  
173 or valine residues, the larger hydrophobic side chains of which are expected to disturb the TM  
174 dimerization (Berger et al., 2010; Endres et al., 2013; Heukers et al., 2013) (Fig. 4A and Sup. Fig.  
175 8). For each mutant, we evaluated the spatial distributions of the TM<sub>32</sub> construct embedded in the  
176 PM bilayer (Fig. 4B).

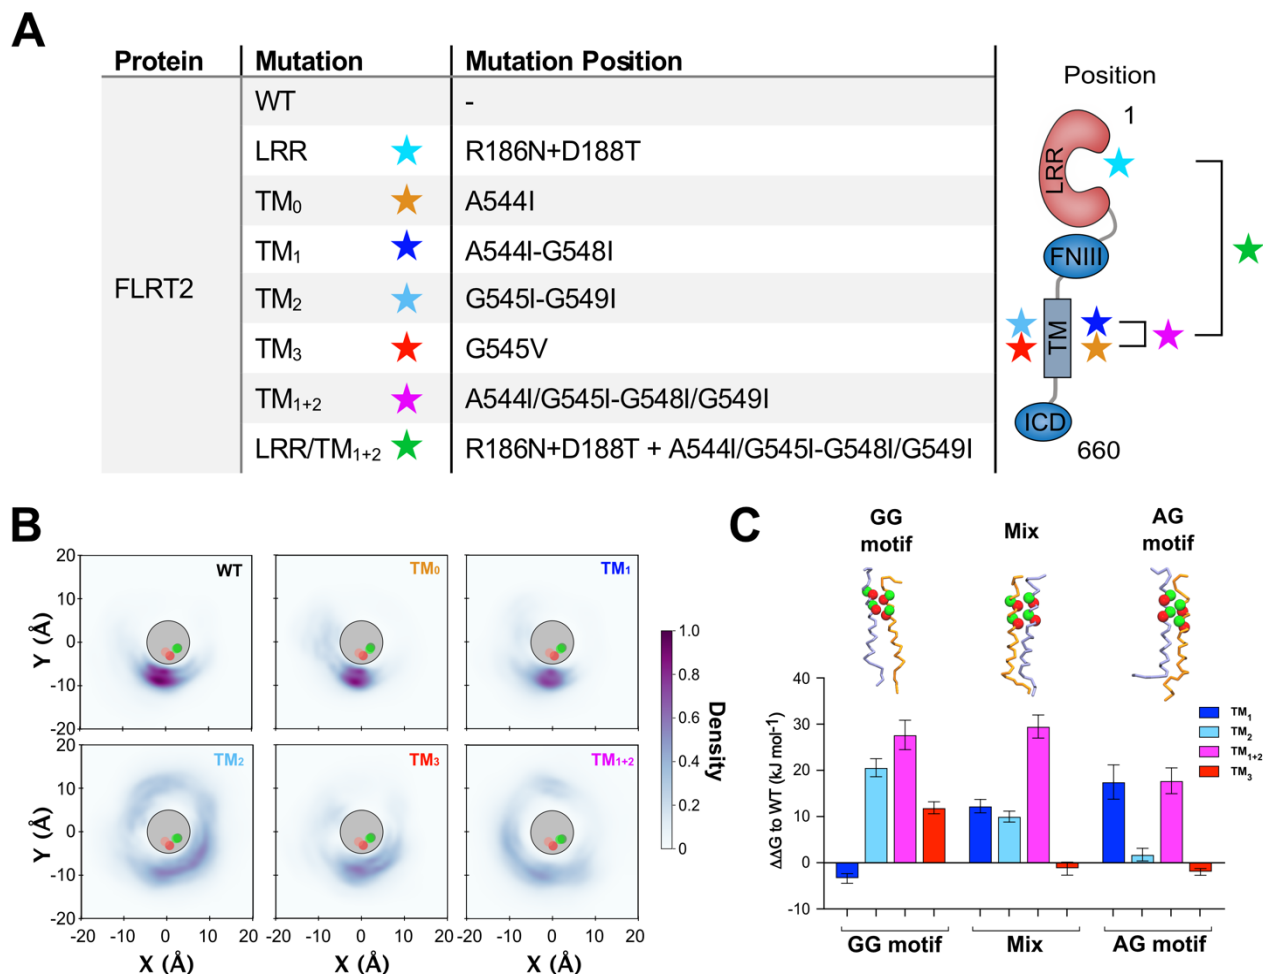

**Fig. 4: *In silico* mutations in the two Small-X<sub>3</sub>-Small motifs affect the TM dimerization and dynamic equilibrium.** **A-** Table of mutations for *in silico* and SMT experiments. The LRR/TM<sub>1+2</sub> mutant was only used for the SMT experiments. **B-** Spatial distribution profiles of one TM<sub>32</sub> helix relative to the other for the CG simulations of both WT and mutants in the plasma membrane. The diagram shows the probability density of finding the backbone particles of one TM<sub>32</sub> helix at a given point in the bilayer plane around the other helix. Green (respectively red) circles depict averaged positions of A<sub>544</sub> and G<sub>548</sub> (respectively G<sub>545</sub> and G<sub>549</sub>) residues. **C-** FEP data showing the effect of the different mutations on the dimer stability. Higher  $\Delta\Delta G$  values indicate a more destabilizing mutation effect (more details in Method and Sup. Fig. 10).

178 Mutations in the A<sub>544</sub>-X<sub>3</sub>-G<sub>548</sub> motif (mutants TM<sub>0</sub> and TM<sub>1</sub>) favored formation of a dimer  
179 with a spatial distribution focused on the G<sub>545</sub>-X<sub>3</sub>-G<sub>549</sub> motif while mutations in the G<sub>545</sub>-X<sub>3</sub>-G<sub>549</sub>

180 motif (mutants TM<sub>2</sub> and TM<sub>3</sub>) drove interactions through the G<sub>544</sub>-X<sub>3</sub>-G<sub>548</sub> motif allowing TM  
181 domains to explore a wider area. Mutations of both motifs (mutant TM<sub>1+2</sub>) enabled one TM domain  
182 to explore the entire bilayer plane surrounding its TM partner, thereby abolishing the specificity of  
183 the TM helix interactions. We also performed analyses of the helix crossing angle against the  
184 distance between the two Small-X<sub>3</sub>-Small motifs and compared these with the WT distribution  
185 (Sup. Fig. 9-B). Mutations clearly affected the TM structure populations exploring conformations  
186 not seen in the PM membrane but visible in other types of membrane such as DPPC and POPC  
187 (Sup. Fig. 9-B and Fig. 3A). For the double mutant, the crossing angle density was clearly more  
188 diffuse than for the WT or the other mutants, further highlighting a loss of specificity (Sup. Fig. 9-  
189 B). We then performed these mutations for TM domains embedded in a DPPC bilayer (Sup. Fig.  
190 2). For the WT, TM dimer dynamics were clearly different in DPPC than in the PM (Fig. 3A).  
191 Conversely, the mutants behaved similarly in DPPC and in the PM bilayer, both in term of spatial  
192 distribution and crossing angle populations (Sup. Fig. 9). Thus, mutants did not seem to be  
193 affected by membrane composition.

194 To further quantify the effect of the mutations on the TM dimerization, we performed non-  
195 equilibrium Free Energy Perturbation (FEP) calculations (see Methods). Here, selected residues  
196 are perturbed between the WT and mutant states, and the free energy of this change was  
197 computed ( $\Delta G_{mut}$ ). By making this change in the context of the dimer or monomer, we can calculate  
198 a  $\Delta\Delta G$  which quantifies how the mutations affect the relative stability of the dimer (Sup. Fig. 10B).  
199 The approach of using CG FEP to model mutational  $\Delta\Delta G$  has recently been applied in the context  
200 of measuring protein-lipid interactions of integral membrane proteins (Corey et al., 2019; Duncan  
201 et al., 2020). As we assume that the effect of the mutations on the dimer state might manifest over  
202 longer timescales than for lipid interactions, we chose to apply a non-equilibrium protocol (see  
203 Methods and Sup. Fig. 10A), which allowed us to maximize the sampling of the mutant and WT  
204 states. This approach has previously been applied to protein stability studies (Gapsys et al., 2016),  
205 as well as to modelling ligand-protein interactions (Gapsys et al., 2021). We performed FEP  
206 calculations for WT to TM<sub>1</sub>, TM<sub>2</sub> and TM<sub>1+2</sub>. These were run using poses with each of the three  
207 main dimer interactions: via the A<sub>544</sub>-X<sub>3</sub>-G<sub>548</sub> motif, via the G<sub>545</sub>-X<sub>3</sub>-G<sub>549</sub>, or through a mix of both  
208 motifs (Fig. 4C). Each pose was embedded in an 80%DPPC-20%CHOL membrane, which was  
209 chosen to keep the membrane as simple as possible for optimal FEP convergence, whilst also  
210 recreating dimerization dynamics seen in the PM membrane (Fig. 3A). Whilst the TM<sub>1</sub> mutant  
211 impacted mostly TM interactions through the A<sub>544</sub>-X<sub>3</sub>-G<sub>548</sub> motif and, respectively, the TM<sub>2</sub> mutant  
212 mainly affected TM interactions via the G<sub>545</sub>-X<sub>3</sub>-G<sub>549</sub> motif, these two mutations only partially  
213 disturbed TM dimerization involving both motifs. To control our approach, we tested the TM<sub>3</sub>  
214 (G545V). This mutant only moderately disturbed the TM dimers interacting through the G<sub>545</sub>-X<sub>3</sub>-  
215 G<sub>549</sub> motif and did not affect the dimers implicating A<sub>544</sub>-X<sub>3</sub>-G<sub>548</sub> motif. On the contrary, the double  
216 mutant TM<sub>1+2</sub> strongly destabilized the three poses, with  $\Delta\Delta G$  values from around 20 kJ mol<sup>-1</sup> to  
217 30 kJ mol<sup>-1</sup>. Assuming these mutants near fully destabilize the dimer (as suggested by Fig. 3C),  
218 this suggests that FLRT2 has a dimerization energy of around 25-30 kJ mol<sup>-1</sup>, similar to estimates  
219 for other TM dimers such as those of glycoporphin A (Domański et al., 2017; Souza et al., 2021)  
220 and ErbA1 (Souza et al., 2021).



Thus, these mutations highlighted two distinct dynamical behaviors of the TM dimer associated with each motif. FEP quantification of TM interactions revealed that only mutation of both motifs together resulted in a  $\Delta\Delta G$  value large enough to abolish TM dimerization.

### Mutations in the Small- $X_3$ -Small motifs affect FLRT2 co-localization in cells

To support the *in silico* results, we performed SMT experiments to assess the contribution of the predicted key residues in the Small- $X_3$ -Small motifs to dimer formation by mutating the relevant glycine residues to isoleucine or valine (Fig. 4A). We tracked FLRT2 receptors on live cells with a sub-pixel accuracy by SMT in two different channels using the dyes Alexa549 and CF640R (Fig. 5A-C). Based on receptor frame-to-frame proximity in each channel (Fig. 5C), we

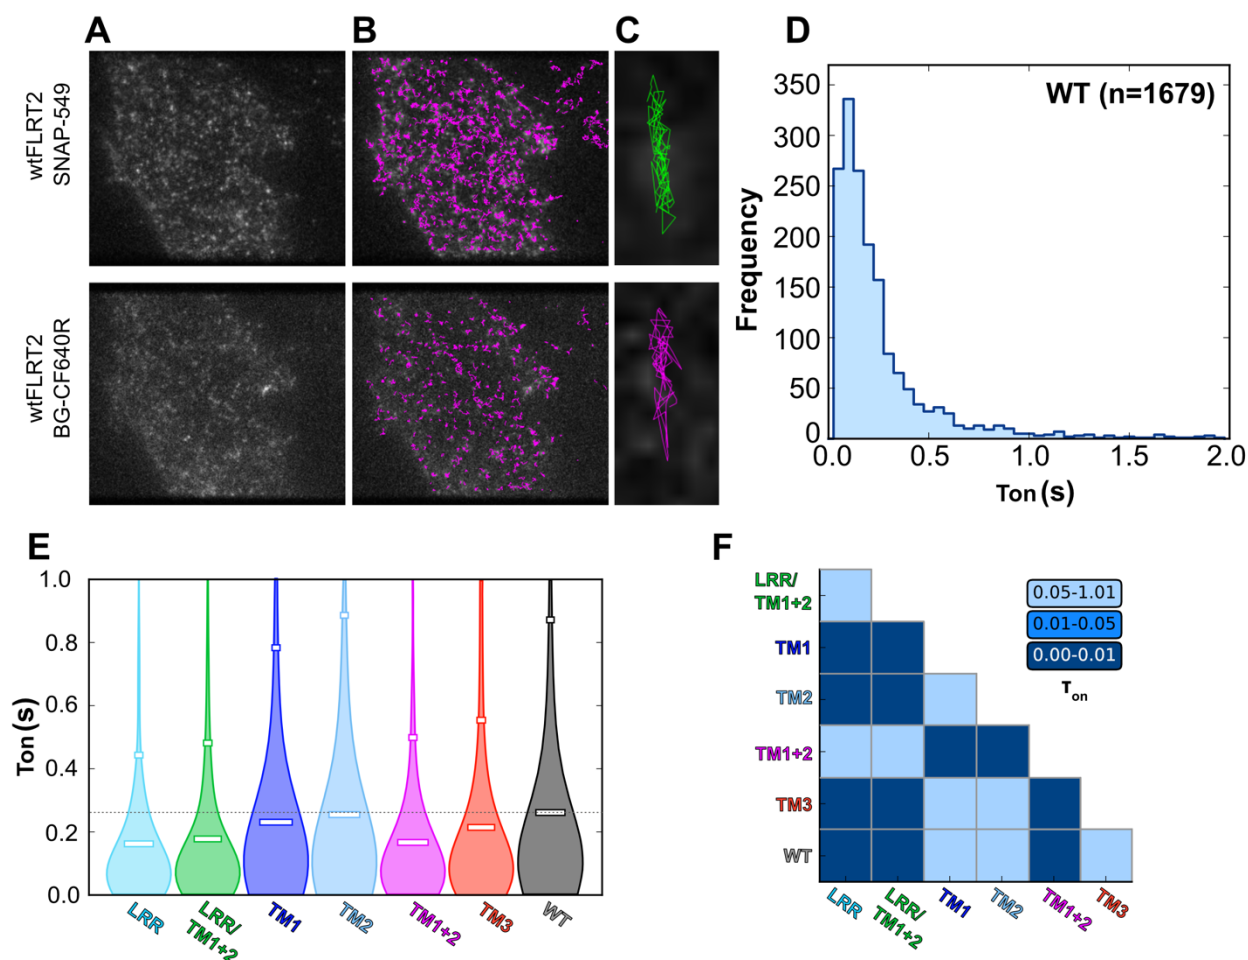

**Fig. 5: Mutations in the TM domains affect colocalization of FLRT2 monomers at the cell surface.**

**A-** Single molecule TIRF image of HeLa cells expressing wtFLRT2 labelled with both SNAP-549 and BG-CF640R. **B-** Single molecule tracks are generated from time series of the molecules under observation. **C-** An example pair of colocalized tracks where the tracks are separated by less than 1 pixel (160 nm) during at least 5 frames (250 ms). **D-** Example  $T_{on}$  distribution for the WT (n represents the number of tracks analyzed). **E-** Distributions of  $T_{on}$  for wtFLRT2 and each of the six FLRT2 mutants tested. **F-** Significance analysis of these distributions based on a Kolmogorov-Smirnov test (more details in Methods section).

then built a distribution of the durations of co-localization events (Fig. 5D), referred to as  $T_{on}$ . The duration of co-localization events is a characteristic of the stability of any interaction or association

233 between the tracked receptors, and is independent of expressed receptor concentration (Zanetti-  
234 Domingues et al., 2018). Comparison of the  $\tau_{on}$  distributions of WT and mutants (**Fig. 5E,F**)  
235 revealed that mutations in only one of the two motifs (either TM<sub>1</sub>, TM<sub>2</sub> or TM<sub>3</sub> alone) were  
236 insufficient to significantly reduce the baseline average  $\tau_{on}$  of wild-type FLRT2. However, mutation  
237 of both Small-X<sub>3</sub>-Small motifs (TM<sub>1+2</sub> mutant) resulted in a significant shift in the  $\tau_{on}$  distribution  
238 towards lower values (**Fig. 5E**). The results are in line with our *in silico* results demonstrating that  
239 the two Small-X<sub>3</sub>-Small motifs are required for FLRT interactions *in cis* (**Fig. 4B,C**). These results  
240 are also consistent with a previous study showing that mutation of both Small-X<sub>3</sub>-Small  
241 transmembrane motifs is necessary to disrupt the EGFR TM dimer and affect receptor function  
242 (Endres et al., 2013). In addition to the mutation of both Small-X<sub>3</sub>-Small motifs, a significant shift  
243 in  $\tau_{on}$  was also observed for the mutation in the LRR ectodomain, known to abolish FLRT-FLRT  
244 trans-interactions (Seiradake et al., 2014), and for the triple mutation LRR+TM<sub>1+2</sub>. In line with the  
245  $\tau_{on}$  results, only diffusion values for the mutants TM<sub>1+2</sub>, LRR, and LRR+TM<sub>1+2</sub>, increased  
246 significantly from the WT (**Sup. Fig. 11**). Although the spatial resolution of single molecule tracking  
247 is insufficient to discriminate between direct pairwise interactions and co-confinement or joint  
248 interactions with the same larger protein complex, this correlation between the decreased duration  
249 of co-localization events and the increased diffusion constant of the tracked receptors is consistent  
250 with the mutations disrupting interactions that usually occur between WT FLRT2 TM domains.

251 Taken together, these data indicate that G<sub>544</sub>-X<sub>3</sub>-G<sub>548</sub> and G<sub>545</sub>-X<sub>3</sub>-G<sub>549</sub> motifs in the  
252 transmembrane region can both sustain FLRT-FLRT association *in cis*, and that at least one of  
253 these motifs is required for wild-type FLRT2 homotypic interactions *in cis*. Interestingly, the LRR  
254 ectodomain, which mediates *in trans* FLRT-FLRT interactions (Seiradake et al., 2014), is also  
255 required for *in cis* interactions.

## 256 Discussion

257 Receptor TM dimer association is often a dynamic process involving multiple states and  
258 weak interactions, hence direct structural studies remain challenging. As a consequence, only a  
259 limited number of TM dimer structures are known and these are often restricted to one state of the  
260 TM dimer (Bugge et al., 2016). To make way with understanding TM functions, MD simulations  
261 are a method of choice to provide detailed insights into the structures of such assemblies. Here,  
262 we have used MD simulations to gain structural insights into the formation of FLRT2 TM dimers.  
263 Our models revealed a dynamic equilibrium between conformations involving two successive  
264 Small-X<sub>3</sub>-Small motifs, G<sub>544</sub>-X<sub>3</sub>-G<sub>548</sub> and G<sub>545</sub>-X<sub>3</sub>-G<sub>549</sub> motifs (**Fig. 1 and 2A**) within a complex lipid  
265 bilayer. Our simulations also revealed interactions between the TM domain of FLRT2 and specific  
266 lipids (cholesterol, PIP<sub>2</sub>, PS, and the unsaturated lipids PAPC and DIPE) (**Fig. 2B**). Receptor-lipid  
267 interactions are an emerging theme in many signalling systems (Corradi et al., 2018; Duncan et  
268 al., 2020) and can affect TM dimerization (Dominguez et al., 2016; Hong and Bowie, 2011; Pawar  
269 and Sengupta, 2021). Interestingly, we found that changing the membrane composition modulates  
270 the dynamics of FLRT2 TM dimerisation (**Fig. 3**) as do mutations in the Small-X<sub>3</sub>-Small  
271 dimerization motifs (**Fig. 4B and Sup. Fig. 9**). As shown by both SMT and MD, targeting both  
272 motifs is necessary to significantly affects dimerization (**Fig. 4B,C and Fig. 5**).

274 The TM helices of other receptors, such as EGFRs and EphAs, dimerize via Small-X<sub>3</sub>-  
 275 Small motifs to transmit extracellular signals to their intracellular enzymatic domains (Bocharov et  
 276 al., 2010; Endres et al., 2013; Fleishman et al., 2002). There is no enzymatic activity associated  
 277 with FLRT, which is best known for its functions as a key adaptor protein that defines the  
 278 structures/functions cell surface signaling hubs (Jackson et al., 2016; Seiradake et al., 2014; Toro  
 279 et al., 2020), and as a regulator of receptor trafficking (Haines et al., 2006; Leyva-Díaz et al., 2014;  
 280 Wheldon et al., 2010). Interestingly, dimerization of the EGFR Small-X<sub>3</sub>-Small motif also regulates  
 281 EGFR trafficking (Heukers et al., 2013) suggesting that *in cis* dimerization via the Small-X<sub>3</sub>-Small

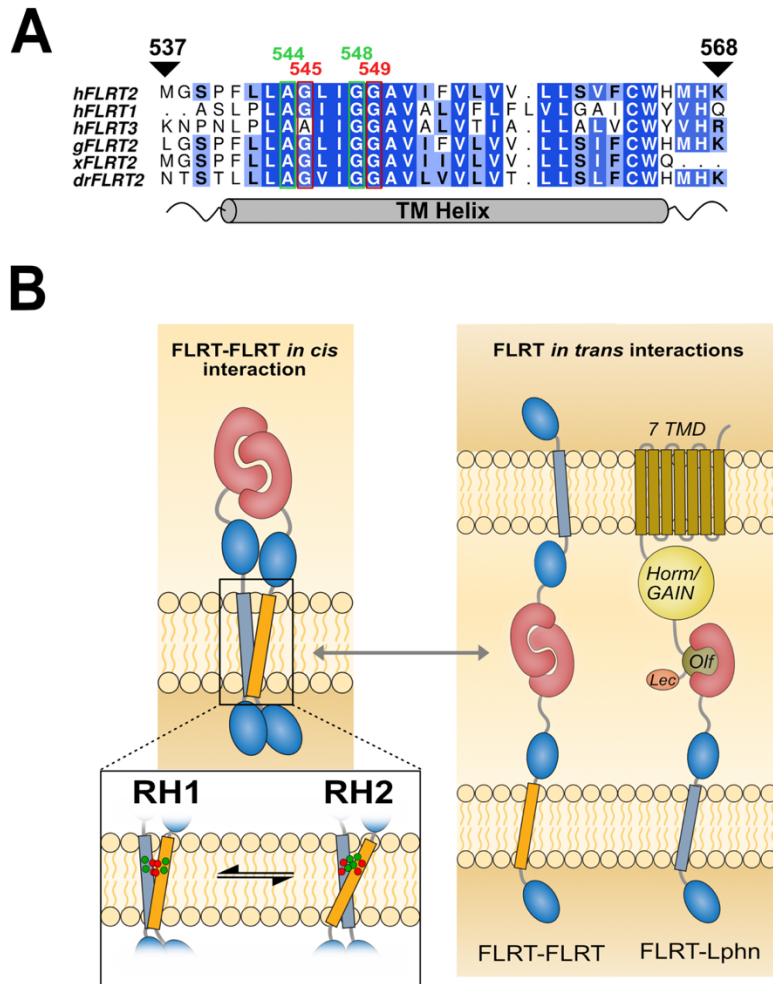

**Fig. 6: Model of the FLRT *cis*-interaction.** **A-** Sequence alignment of the TM domain for FLRT1-3 in human and for FLRT2 in other species (human:h, chicken:g, frog:x, fish:dr). **B-** Model of FLRT2 *cis*-interactions that may compete with different FLRT2 *trans* interactions. The interconversion in between RH1, involving the G<sub>545</sub>-G<sub>549</sub> motif (in red), and RH2 interactions, driven by the A<sub>544</sub>-G<sub>548</sub> motif (in green), may be modulated by mutations in the TM domain or environmental conditions such as changes in the lipid composition of the membrane.

282 motifs may be a conserved feature in the regulation of receptor localization and trafficking, found  
 283 also in FLRTs. Indeed, the Small-X<sub>3</sub>-Small motifs are conserved in all three FLRT human  
 284 homologues (FLRT 1-3) and in different species (Fig. 6A). Interestingly, the COSMIC database  
 285 (Forbes et al., 2011) lists a number of cancer-related mutations targeting the TM domain of FLRT2.  
 286 Two such mutations (A544V and G545V) map to the Small-X<sub>3</sub>-Small motifs described here, and

287 may affect FLRT2 function and dynamics as seen in MD simulations (**Fig. 3**).

288 Unexpectedly, our results show that the same mutation in the LRR domain that disrupts  
289 FLRT-FLRT interactions *in trans* (Seiradake et al., 2014) also disrupts FLRT-FLRT interaction *in*  
290 *cis*, posing the question whether FLRT *cis* and *trans* interactions are competitive. Adding  
291 complexity to this issue is the observation that the same mutation also abolishes *trans* FLRT-Lphn  
292 interactions (Jackson et al., 2015; Seiradake et al., 2014). These findings suggest that Lphn may  
293 also compete with *in cis* FLRT-FLRT dimerization, leading to a mechanism in which FLRTs switch  
294 between *in cis* dimerization and different *in trans* interactions via the LRR domain (**Fig. 5B**).  
295 Interplay between *cis* and *trans* interactions are key features of typical adhesion proteins, such as  
296 cadherins and protocadherins, and is required for effective cell-cell recognition (Honig and Shapiro,  
297 2020). Like other adhesion molecules, FLRTs are broadly expressed. The conformational  
298 versatility of its TM domain, and resulting in *cis* binding capability, help explain how these proteins  
299 regulate a vast diversity of fundamental developmental processes.

## 302 **Materials and Methods**

### 304 **Modeling Transmembrane domain and Molecular Dynamics Simulations**

305 Results from the PSIPred (Jones, 1999), PRED-TMR2 (Pasquier and Hamodrakas, 1999), and  
306 HMMTOP (Tusnady and Simon, 2001) servers were combined to predict the membrane  
307 embedded helical region of FLRT2. Twenty-four residues of human FLRT2 (residues 541 – 564)  
308 were selected to form the core of the TM helix (TM<sub>24</sub>). The transmembrane domain was created  
309 using the Pymol secondary structure creation script: `build_seq.py`  
310 (<http://pldserver1.biochem.queensu.ca/~rlc/work/pymol/>) and then converted into coarse-grained  
311 model. For TM<sub>32</sub>, the four residues both N- and C-terminal of TM<sub>24</sub> were modelled as random coils  
312 using Modeller 9v9 (Webb and Sali, 2016).

313 Unbiased coarse-grained MD (CG-MD) simulations were performed using GROMACS 4.6  
314 ([www.gromacs.org](http://www.gromacs.org)) (Pronk et al., 2013) and GROMACS 2018 (Abraham et al., 2015) with the  
315 MARTINI 2.1 forcefield (Marrink et al., 2007; Monticelli et al., 2008). For symmetric membranes  
316 (DPPC, POPC and DPPC+CHOL), the temperature was 323K. Electrostatic interactions were  
317 shifted to zero between 0 and 1.2 nm and the Lennard-Jones interactions between 0.9 and 1.2  
318 nm. A Berendsen thermostat in combination with a Berendsen barostat with a coupling constant  
319 of 1.0 ps, a compressibility of  $5.0 \times 10^{-6} \text{ bar}^{-1}$ , and a reference pressure of 1 bar were used. The  
320 integration timestep was 20 fs. Simulations were run for either 1 or 2  $\mu\text{s}$  (**Sup. Table 1**) over twenty  
321 to thirty replicates to ensure exhaustive sampling of TM helix dimer structures. For the PM  
322 membrane, we have used the CHARMM-GUI website (Qi et al., 2015) to create the system.  
323 Temperature was maintained at 310K using the V-rescale thermostat (Bussi et al., 2007). Pressure  
324 was set to 1 bar using the Parrinello-Rahman barostat (Parrinello and Rahman, 1981) with a  
325 coupling constant of 12 ps and a compressibility value of  $3 \times 10^{-4} \text{ bar}^{-1}$ . After minimization and  
326 equilibration steps, we ran 2  $\mu\text{s}$  of simulations to let the membrane relax. On the final snapshot,  
327 we embedded the TM segments and rerun minimization and equilibration steps. To taking into  
328 account that this complex system needs longer timescales to equilibrate than symmetric POPC



and DPPC membranes, we ran simulations of 4 $\mu$ s (**Sup. Table 1**) over thirty replicates. The integration timestep was 20 fs.

We then converted the three main representative (**Sup. Fig. 7**) coarse grained structures into atomistic models using the CHARMM-GUI MARTINI to All-atom converter (<http://www.charmm-gui.org/?doc=input/converter.martini2all>). Atomistic simulations were performed with GROMACS 2018 in combination with the CHARMM36 forcefield (Huang and MacKerell, 2013; Lee et al., 2014) and TIP3P water model. The temperature was held at 310K. A first step of energy minimization was performed using the steepest descent algorithm and was equilibrated with a constant temperature ensemble (canonical ensemble, NVT, 310 K) ensemble for 100 ps, followed by a 100 ps equilibration at constant pressure (isothermal-isobaric, NPT, 1 bar). We then ran 100 ns of equilibration by keeping the protein backbone constrained followed by 400 ns of unrestrained production run. We applied a Nosé-Hoover thermostat (Martyna et al., 1992) on the system, coupled with the Parrinello–Rahman barostat (Parrinello and Rahman, 1981), with a compressibility of  $4.5 \times 10^{-5} \text{ bar}^{-1}$ . Long-range electrostatics were modeled using the Particle-Mesh Ewald method (Essmann et al., 1995). All bonds were treated using the LINCS algorithm (Hess, 2008). The integration time step was 1 fs.

### Simulation analysis

Protein and lipid structures were rendered using VMD (Humphrey et al., 1996). Simulations trajectories were analyzed using a combination of Tcl/VMD and Python scripts. Matplotlib was used to create graphs and images of TMD monomer distances, contact matrices, TMD density rendering, and crossing angles analysis. All the scripts used to perform these analyses are available at: <https://github.com/MChavent/FLRT>. Distances between the two centers of mass of each TM helix were calculated. Density, TM contacts and crossing angle calculations were performed every nanosecond for the part of the trajectory where a dimer was formed. In Figure 3-A (resp. 4-B), the values were renormalized to take into account both the maximum values and time of interactions to properly compare the different membrane (resp. Wild Type and mutants) systems.

### Non-equilibrium free energy perturbation (FEP) calculations

Protein coordinates were extracted from the equilibrium simulations data representing key dimer conformations: one interaction via  $A_{544}-X_3-G_{548}$  motif, one interaction via the  $G_{545}-X_3-G_{549}$ , and one interaction involving both motifs (**Fig. 4C**). For each mutation (TM<sub>1</sub>, TM<sub>2</sub>, TM<sub>1+2</sub> and TM<sub>3</sub>), side chain beads were added based on the backbone ('BB') coordinates.

Each pose was built into solvated membranes of 10 x 10 x 10 nm comprising 80% DPPC and 20% cholesterol using the *insane* protocol (Wassenaar et al., 2015b). CG ions were then added to 0.0375 M (roughly equivalent to 0.15M), and the systems were minimized using the steepest descent method. Two rounds of NPT equilibration were run, first 25 ps with 5 fs timesteps, then 1000 ns with 20 fs timesteps. In both cases the protein 'BB' beads had 1000 kJ mol<sup>-1</sup>.nm<sup>-2</sup> xyz positional restraints applied. The temperature was set to 323 K using the V-rescale thermostat (Bussi et al., 2007), with semi-isotropic pressure held at 1 atm using the Berendsen barostat.

370 For each pose and mutant, non-equilibrium FEP was then carried out (Gapsys et al., 2021). State  
371 0 was set to be the mutant, and state 1 set to be WT. For the relevant residue, this involved the  
372 conversion of the BB bead type and setting the sidechain beads to dummy atoms with no LJ or  
373 Coulombic interactions. For each state, the system was then minimized using steepest descents,  
374 and then simulated for 20 x 100 ns using 20 fs timesteps in the NPT ensemble with the V-rescale  
375 thermostat at 323 K (Bussi et al., 2007), and with semi-isotropic pressure held at 1 atm using the  
376 Parrinello-Rahman barostat (Parrinello and Rahman, 1981).

377 For each 100 ns simulation, snapshots were taken every 1 ns from 25-100 ns. Each snapshot was  
378 then subjected to 200 ps non-equilibrium FEP (summarized in **Sup. Fig. 10A**). Soft-core potentials  
379 on both LJ and Coulombic terms, with an alpha of 0.3, a sigma of 0.25 and a soft-core power of 1.  
380 200 ps calculations were run for the monomer states, which was sufficient for convergence. For  
381 the dimer states, 1 ns FEP calculations were run for the TM<sub>1</sub> mutants, and 4 ns FEP calculations  
382 were run for the TM<sub>2</sub> and TM<sub>1+2</sub>. For the TM<sub>3</sub> mutations, 200 ps was sufficient sampling for  
383 convergence. FEP calculations were run in both the forward (from state 0 to state 1) and backward  
384 (from state 1 to state 0) direction. The  $\Delta G$  values were then be obtained from the overlap of forward  
385 and backward work distributions using the Crooks Fluctuation Theorem (Crooks, 1999). Analyses  
386 were carried out using pmx (Gapsys et al., 2015).

387 Once energies were calculated for each pose with each mutation,  $\Delta\Delta G$  values were obtained from  
388 the thermodynamic cycle in (**Sup. Fig. 10B**), using the following equation:  
389

$$\Delta\Delta G \text{ to WT} = \Delta G_{\text{mut-wt(dimer)}} - \Delta G_{\text{mut-wt(monomer)}}$$

390  
391 Note that the values for  $\Delta G_{\text{mut-wt(monomer)}}$  were obtained by doubling the monomer FEP  
392 calculations to account for there being only 1 copy of the FLRT2 TM domain present.  
393

394 Convergence was tested using 2 metrics. Firstly, consistent variance in FEP values from  
395 snapshots taken over the 25-100 ns timescale (**Sup. Fig. 10C**). Second, Convergence analysis  
396 measuring the degree of overlap between the forward and reverse FEP calculations (**Sup. Fig.**  
397 **10D**).

## 398 399 **Cloning**

400 SNAP-FLRT2 was cloned into the EcoRI/XhoI restriction sites of the pHSec vector (Aricescu et  
401 al., 2006). In SNAP-FLRT2 an N-terminal SNAP tag (containing the RPTP $\sigma$  signal sequence) was  
402 fused to murine FLRT2 (residues A35 – T660) via an HA-tag. Mutations were introduced using  
403 molecular cloning.  
404

## 405 **Cell Culture and Transfection**

406 HeLa cells were seeded onto uncoated 4-well  $\mu$ -Slides, #1.5 polymer coverslips (Ibidi) at a density  
407 of 1.1x10<sup>5</sup> cells/well in 600  $\mu$ L phenol red-free DMEM + 10% FBS + 1% L-Gln + 1% NEAA  
408 (complete medium). After 24 h, each well was transfected with 2.0  $\mu$ g plasmid DNA using  
409 FuGENE6, according to the manufacturer's instructions. Cells were maintained at 37 °C, 5% CO<sub>2</sub>  
410 and were prepared for experiments 12-18 hours post-transfection.  
411

## 412 **BG-CF640R Conjugation**

413 CF640R succinimidyl ester (Biotium) was reacted with BG-NH<sub>2</sub> (New England Biolabs) to produce  
414 the benzylguanine functionalised dye BG-CF640R. 1  $\mu$ mol of CF640R succinimidyle ester was  
415 reconstituted in DMSO and dissolved in 10 ml 0.1 M sodium bicarbonate buffer (pH 8.4). 1.5  $\mu$ mol  
416 BG-NH<sub>2</sub> in DMSO was added to the dye mixture and vortexed well. The reaction was shaken at  
417 room temperature overnight before dilution with deionised water. For all subsequent dilutions the  
418 conjugation efficiency was assumed to be 100%.

## 419 **Two-Colour Fluorescent Labelling**

420 To achieve an approximately equal ratio of single molecules labelled with SNAP Dy549 and BG-  
421 CF640R a two-step staining procedure was used. Firstly, the medium was removed from each well  
422 of the 4-well  $\mu$ -Slides and the cells were washed twice with 300  $\mu$ L complete medium. BG-CF60R  
423 was diluted in complete medium to a final concentration of 10 nM and applied to each well of the  
424  $\mu$ -Slide for 5 min. The medium was then exchanged for 150  $\mu$ L 10 nM SNAP-Dy549 (SNAP-  
425 Surface 549, New England Biolabs) in complete medium and incubated for a further 5 min. All  
426 labelling steps were performed at 37°C, 5% CO<sub>2</sub>. Labelled cells were then washed three times  
427 with complete medium and the final wash replaced with Live Cell Imaging Solution plus 1:50  
428 ProLong Antifade reagent (both ThermoFisher) and incubated for at least 15 min, at 37 °C, 5%  
429 CO<sub>2</sub> before beginning experiments.  
430

## 431 **Single molecule image acquisition and feature tracking**

432 Single-molecule images were acquired using an Axiovert 200M microscope with an iLas2 TIRF  
433 illuminator (Cairn, UK), with a  $\times$ 100 oil-immersion objective ( $\alpha$ -Plan-Fluar, NA = 1.46; Zeiss, UK)  
434 and an EMCCD (iXon X3; Andor, UK). The microscope is also equipped with a wrap-around  
435 incubator (Pecon XL S1). The 561 and 642 nm lines of a LightHub laser combiner (Omicron-  
436 laserage Laserprodukte GmbH) were used to illuminate the sample and an Optosplit Image Splitter  
437 (Cairn Research) was used to separate the image into its spectral components as described  
438 previously (Webb et al., 2006). The field of view of each channel for single-molecule imaging was  
439 80  $\times$  30  $\mu$ m. Typically, for each condition at least 50 fields of view comprising one or more cells  
440 were acquired from a total of 4 independent biological replicates. Single molecules were tracked  
441 in each field of view for 30s, by which time the majority of molecules had undergone  
442 photobleaching. All single-molecule time series data were analyzed using the multidimensional  
443 analysis software described previously (Rolfe et al., 2011). Briefly, this software performs frame-  
444 by-frame Bayesian segmentation to detect and measure features to sub-pixel precision, then links  
445 these features through time to create tracks using a simple proximity-based algorithm. The  
446 software determines cubic polynomial registration transformations between wavelength channels  
447 from images of fluorescent beads. Feature detection and tracking was performed independently in  
448 each channel.  
449

## 450 **Calculation of colocalisation and $\tau_{ON}$**

451 Two-colour TIRF images of the basolateral surfaces of cells were chromatically separated by a  
452 beam splitter and registered using custom-made software to map the relative positions of the

453 probes over the time course of data acquisition (Rolfe et al., 2011) and extract single molecule  
454 tracks. A colocalisation event was defined as one in which a track in one channel moves within  
455 one pixel of a track in the other channel before they move apart again. The duration of each such  
456 event is one measurement of  $T_{ON}$ . This parameter indicates the stability of presumptive receptor  
457 interactions while being insensitive to variation in expression of the receptors between cells or  
458 different levels of labelling with the two probes within cells (Zanetti-Domingues et al., 2018). The  
459 track positions were registered between channels prior to this analysis. To reduce the impact of  
460 localisation error on these results a temporal Gaussian smoothing filter of FWHM 4 frames  
461 (200 ms) was applied to the position traces before the colocalisation analyses.  $T_{ON}$  distributions  
462 were compared between conditions using the two-sample Kolmogorov-Smirnov test to decide  
463 which were significantly different.

### 464 **Mean squared displacement and diffusion calculation**

465 From single particle tracks, mean squared displacement (MSD) curves were calculated as  
466  $MSD(\Delta T) = \langle |r_i(T+\Delta T) - r_i(T)|^2 \rangle$  where  $|r_i(T+\Delta T) - r_i(T)|$  is the displacement between position of track  $i$   
467 at time  $T$  and time  $T+\Delta T$  and the average is over all pairs of points separated by  $\Delta T$  in each track.  
468 The average instantaneous diffusion coefficient ( $D$ ) for these tracks was calculated by fitting a  
469 straight line to the first two points of the MSD curve then calculating  $D$  directly from the gradient  $m$   
470 of the fit,  $D = m/4$ . The tracks for each single molecule field of view (FOV) were pooled into one  
471 MSD curve per FOV to produce a sample of  $D$  values, one value per FOV per condition. These  $D$   
472 distributions were compared between conditions using the Kolmogorov-Smirnov test to decide  
473 which were significantly different. The two-sample KS test is a non-parametric test of the null  
474 hypothesis that two independent samples are drawn from the same continuous distribution. We  
475 use the 2-sided KS test implemented in Python `scipy.stats.ks_2samp` function.  
476



## References

- 477  
478  
479 Abraham, M.J., Murtola, T., Schulz, R., Páll, S., Smith, J.C., Hess, B., and Lindahl, E. (2015). GROMACS:  
480 High performance molecular simulations through multi-level parallelism from laptops to supercomputers.  
481 *SoftwareX* 1–2, 19–25.
- 482 Aricescu, A.R., Lu, W., and Jones, E.Y. (2006). A time- and cost-efficient system for high-level protein  
483 production in mammalian cells. *Acta Crystallographica. Section D, Biological Crystallography* 62, 1243–  
484 1250.
- 485 Arkhipov, A., Shan, Y., Das, R., Endres, N.F., Eastwood, M.P., Wemmer, D.E., Kuriyan, J., and Shaw, D.E.  
486 (2013). Architecture and membrane interactions of the EGF receptor. *Cell* 152, 557–569.
- 487 Berger, B.W., Kulp, D.W., Span, L.M., DeGrado, J.L., Billings, P.C., Senes, A., Bennett, J.S., and DeGrado,  
488 W.F. (2010). Consensus motif for integrin transmembrane helix association. *Proc Natl Acad Sci USA* 107,  
489 703–708.
- 490 Bocharov, E.V., Mayzel, M.L., Volynsky, P.E., Goncharuk, M.V., Ermolyuk, Y.S., Schulga, A.A., Artemenko,  
491 E.O., Efremov, R.G., and Arseniev, A.S. (2008). Spatial structure and pH-dependent conformational diversity  
492 of dimeric transmembrane domain of the receptor tyrosine kinase EphA1. *The Journal of Biological*  
493 *Chemistry* 283, 29385–29395.
- 494 Bocharov, E.V., Mayzel, M.L., Volynsky, P.E., Mineev, K.S., Tkach, E.N., Ermolyuk, Y.S., Schulga, A.A.,  
495 Efremov, R.G., and Arseniev, A.S. (2010). Left-handed dimer of EphA2 transmembrane domain: Helix  
496 packing diversity among receptor tyrosine kinases. *Biophysical Journal* 98, 881–889.
- 497 Bottaro, S., and Lindorff-Larsen, K. (2018). Biophysical experiments and biomolecular simulations: A perfect  
498 match? *Science* 361, 355–360.
- 499 Bugge, K., Lindorff-Larsen, K., and Kragelund, B.B. (2016). Understanding single-pass transmembrane  
500 receptor signaling from a structural viewpoint-what are we missing? *The FEBS Journal* 283, 4424–4451.
- 501 Bussi, G., Donadio, D., and Parrinello, M. (2007). Canonical sampling through velocity rescaling. *The Journal*  
502 *of Chemical Physics* 126, 014101.
- 503 Chavent, M., Duncan, A.L., and Sansom, M.S. (2016). Molecular dynamics simulations of membrane  
504 proteins and their interactions: from nanoscale to mesoscale. *Current Opinion in Structural Biology* 40, 8–  
505 16.
- 506 Chothia, C., Levitt, M., and Richardson, D. (1981). Helix to helix packing in proteins. *Journal of Molecular*  
507 *Biology* 145, 215–250.
- 508 Corey, R.A., Vickery, O.N., Sansom, M.S.P., and Stansfeld, P.J. (2019). Insights into Membrane Protein–  
509 Lipid Interactions from Free Energy Calculations. *J Chem Theory Comput* 15, 5727–5736.
- 510 Corradi, V., Mendez-Villuendas, E., Ingólfsson, H.I., Gu, R.-X., Siuda, I., Melo, M.N., Moussatova, A.,  
511 DeGagné, L.J., Sejdiu, B.I., Singh, G., et al. (2018). Lipid–Protein Interactions Are Unique Fingerprints for  
512 Membrane Proteins. *ACS Central Science* 4, 709–717.
- 513 Crooks, G.E. (1999). Entropy production fluctuation theorem and the nonequilibrium work relation for free  
514 energy differences. *Phys Rev E* 60, 2721–2726.
- 515 Cymer, F., Veerappan, A., and Schneider, D. (2012). Transmembrane helix-helix interactions are modulated  
516 by the sequence context and by lipid bilayer properties. *Biochimica et Biophysica Acta* 1818, 963–973.
- 517 Defour, J.-P., Itaya, M., Gryshkova, V., Brett, I.C., Pecquet, C., Sato, T., Smith, S.O., and Constantinescu,  
518 S.N. (2013). Tryptophan at the transmembrane–cytosolic junction modulates thrombopoietin receptor  
519 dimerization and activation. *Proceedings of the National Academy of Sciences of the United States of*  
520 *America* 110, 2540–2545.
- 521 Domański, J., Hedger, G., Best, R.B., Stansfeld, P.J., and Sansom, M.S.P. (2017). Convergence and  
522 Sampling in Determining Free Energy Landscapes for Membrane Protein Association. *The Journal of*  
523 *Physical Chemistry B* 121, 3364–3375.
- 524 Dominguez, L., Foster, L., Straub, J.E., and Thirumalai, D. (2016). Impact of membrane lipid composition on  
525 the structure and stability of the transmembrane domain of amyloid precursor protein. *Proc National Acad*  
526 *Sci* 113, E5281–E5287.
- 527 Duncan, A.L., Corey, R.A., and Sansom, M.S.P. (2020). Defining how multiple lipid species interact with  
528 inward rectifier potassium (Kir2) channels. *Proc Natl Acad Sci USA* 117, 7803–7813.

- 529 Endres, N.F., Das, R., Smith, A.W., Arkhipov, A., Kovacs, E., Huang, Y., Pelton, J.G., Shan, Y., Shaw, D.E.,  
530 Wemmer, D.E., et al. (2013). Conformational coupling across the plasma membrane in activation of the EGF  
531 receptor. *Cell* 152, 543–556.
- 532 Essmann, U., Perera, L., Berkowitz, M.L., Darden, T., Lee, H., and Pedersen, L.G. (1995). A smooth particle  
533 mesh Ewald method. *The Journal of Chemical Physics* 103, 8577–8593.
- 534 Fleishman, S.J., Schlessinger, J., and Ben-Tal, N. (2002). A putative molecular-activation switch in the  
535 transmembrane domain of erbB2. *Proceedings of the National Academy of Sciences of the United States of*  
536 *America* 99, 15937–15940.
- 537 Forbes, S.A., Bindal, N., Bamford, S., Cole, C., Kok, C.Y., Beare, D., Jia, M., Shepherd, R., Leung, K., and  
538 Menzies, A. (2011). COSMIC: mining complete cancer genomes in the Catalogue of Somatic Mutations in  
539 Cancer. *Nucleic Acids Research* 39, D945–D950.
- 540 Gapsys, V., Michielssens, S., Seeliger, D., and Groot, B.L. de (2015). pmx: Automated protein structure and  
541 topology generation for alchemical perturbations. *J Comput Chem* 36, 348–354.
- 542 Gapsys, V., Michielssens, S., Seeliger, D., and de Groot, B.L. (2016). Accurate and Rigorous Prediction of  
543 the Changes in Protein Free Energies in a Large-Scale Mutation Scan. *Angewandte Chemie Int Ed* 55,  
544 7364–7368.
- 545 Gapsys, V., Yildirim, A., Aldeghi, M., Khalak, Y., Spoel, D. van der, and Groot, B.L. de (2021). Accurate  
546 absolute free energies for ligand–protein binding based on non-equilibrium approaches. *Commun Chem* 4,  
547 61.
- 548 Haines, B.P., Wheldon, L.M., Summerbell, D., Heath, J.K., and Rigby, P.W.J. (2006). Regulated expression  
549 of FLRT genes implies a functional role in the regulation of FGF signalling during mouse development.  
550 *Developmental Biology* 297, 14–25.
- 551 Hess, B. (2008). P-LINCS: A Parallel Linear Constraint Solver for Molecular Simulation. *Journal of Chemical*  
552 *Theory and Computation* 4, 116–122.
- 553 Heukers, R., Vermeulen, J.F., Fereidouni, F., Bader, A.N., Voortman, J., Roovers, R.C., Gerritsen, H.C., and  
554 Henegouwen, P.M.P. van B. en (2013). Endocytosis of EGFR requires its kinase activity and N-terminal  
555 transmembrane dimerization motif. *Journal of Cell Science* 126, 4900–4912.
- 556 Hong, H., and Bowie, J.U. (2011). Dramatic Destabilization of Transmembrane Helix Interactions by  
557 Features of Natural Membrane Environments. *Journal of the American Chemical Society* 133, 11389–11398.
- 558 Honig, B., and Shapiro, L. (2020). Adhesion Protein Structure, Molecular Affinities, and Principles of Cell-  
559 Cell Recognition. *Cell* 181, 520–535.
- 560 Huang, J., and MacKerell, A.D. (2013). CHARMM36 all-atom additive protein force field: Validation based  
561 on comparison to NMR data. *Journal of Computational Chemistry* 34, 2135–2145.
- 562 Humphrey, W., Dalke, A., and Schulten, K. (1996). VMD: visual molecular dynamics. *J Mol Graph* 14, 33–  
563 38, 27–28.
- 564 Ingólfsson, H.I., Bhatia, H., Zeppelin, T., Bennett, W.F.D., Carpenter, K.A., Hsu, P.C., Dharuman, G.,  
565 Bremer, P.-T., Schjøtt, B., Lightstone, F.C., et al. (2020). Capturing Biologically Complex Tissue-Specific  
566 Membranes at Different Levels of Compositional Complexity. *The Journal of Physical Chemistry B* 124,  
567 7819–7829.
- 568 Jackson, V.A., Toro, D. del, Carrasquero, M., Roversi, P., Harlos, K., Klein, R., and Seiradake, E. (2015).  
569 Structural basis of latrophilin-FLRT interaction. *Structure (London, England : 1993)* 23, 774–781.
- 570 Jackson, V.A., Mehmood, S., Chavent, M., Roversi, P., Carrasquero, M., Toro, D. del, Seyit-Bremer, G.,  
571 Ranaivoson, F.M., Comoletti, D., Sansom, M.S.P., et al. (2016). Super-complexes of adhesion GPCRs and  
572 neural guidance receptors. *Nature Communications* 7, 11184.
- 573 Jones, D.T. (1999). Protein secondary structure prediction based on position-specific scoring matrices 1  
574 Edited by G. Von Heijne. *Journal of Molecular Biology* 292, 195–202.
- 575 Karaulanov, E.E., Böttcher, R.T., and Niehrs, C. (2006). A role for fibronectin-leucine-rich transmembrane  
576 cell-surface proteins in homotypic cell adhesion. *EMBO Reports* 7, 283–290.
- 577 Laganowsky, A., Reading, E., Allison, T.M., Ulmschneider, M.B., Degiacomi, M.T., Baldwin, A.J., and  
578 Robinson, C.V. (2014). Membrane proteins bind lipids selectively to modulate their structure and function.  
579 *Nature* 510, 172–175.

- 580 Lee, S., Tran, A., Allsopp, M., Lim, J.B., Hénin, J., and Klauda, J.B. (2014). CHARMM36 United Atom Chain  
581 Model for Lipids and Surfactants. *The Journal of Physical Chemistry B* *118*, 547–556.
- 582 Leyva-Díaz, E., Toro, D. del, Menal, M.J., Cambray, S., Susín, R., Tessier-Lavigne, M., Klein, R., Egea, J.,  
583 and López-Bendito, G. (2014). FLRT3 is a Robo1-interacting protein that determines Netrin-1 attraction in  
584 developing axons. *Current Biology : CB* *24*, 494–508.
- 585 Liu, R., Li, Y., and Liu, L. (2016). Single molecule fluorescence spectroscopy for quantitative biological  
586 applications. *Quantitative Biology* *4*, 177–191.
- 587 Lu, Y.C., Nazarko, O.V., Sando, R., Salzman, G.S., Li, N.-S., Südhof, T.C., and Araç, D. (2015). Structural  
588 Basis of Latrophilin-FLRT-UNC5 Interaction in Cell Adhesion. *Structure (London, England : 1993)* *23*, 1678–  
589 1691.
- 590 Maretto, S., Müller, P.-S., Aricescu, A.R., Cho, K.W.Y., Bikoff, E.K., and Robertson, E.J. (2008). Ventral  
591 closure, headfold fusion and definitive endoderm migration defects in mouse embryos lacking the fibronectin  
592 leucine-rich transmembrane protein FLRT3. *Developmental Biology* *318*, 184–193.
- 593 Marrink, S.J., Risselada, H.J., Yefimov, S., Tieleman, D.P., and Vries, A.H. de (2007). The MARTINI force  
594 field: coarse grained model for biomolecular simulations. *The Journal of Physical Chemistry B* *111*, 7812–  
595 7824.
- 596 Marrink, S.J., Corradi, V., Souza, P.C.T., Ingólfsson, H.I., Tieleman, D.P., and Sansom, M.S.P. (2019).  
597 Computational Modeling of Realistic Cell Membranes. *Chem Rev* *119*, 6184–6226.
- 598 Martyna, G.J., Klein, M.L., and Tuckerman, M. (1992). Nosé–Hoover chains: The canonical ensemble via  
599 continuous dynamics. *J Chem Phys* *97*, 2635–2643.
- 600 Monticelli, L., Kandasamy, S.K., Periole, X., Larson, R.G., Tieleman, D.P., and Marrink, S.-J. (2008). The  
601 MARTINI Coarse-Grained Force Field: Extension to Proteins. *Journal of Chemical Theory and Computation*  
602 *4*, 819–834.
- 603 O’Sullivan, M.L., Wit, J. de, Savas, J.N., Comoletti, D., Otto-Hitt, S., Yates, J.R., and Ghosh, A. (2012). FLRT  
604 proteins are endogenous latrophilin ligands and regulate excitatory synapse development. *Neuron* *73*, 903–  
605 910.
- 606 Parrinello, M., and Rahman, A. (1981). Polymorphic transitions in single crystals: A new molecular dynamics  
607 method. *Journal of Applied Physics* *52*, 7182.
- 608 Pasquier, C., and Hamodrakas, S.J. (1999). An hierarchical artificial neural network system for the  
609 classification of transmembrane proteins. *Protein Engineering* *12*, 631–634.
- 610 Pawar, A.B., and Sengupta, D. (2021). Role of Cholesterol in Transmembrane Dimerization of the ErbB2  
611 Growth Factor Receptor. *J Membr Biology* 1–10.
- 612 Pliotas, C., Dahl, A.C.E., Rasmussen, T., Mahendran, K.R., Smith, T.K., Marius, P., Gault, J., Banda, T.,  
613 Rasmussen, A., Miller, S., et al. (2015). The role of lipids in mechanosensation. *Nature Structural &*  
614 *Molecular Biology* *22*, 991–998.
- 615 Pronk, S., Páll, S., Schulz, R., Larsson, P., Bjelkmar, P., Apostolov, R., Shirts, M.R., Smith, J.C., Kasson,  
616 P.M., Spoel, D.V.D., et al. (2013). GROMACS 4.5: a high-throughput and highly parallel open source  
617 molecular simulation toolkit. *Bioinformatics (Oxford, England)* *29*, 845–854.
- 618 Qi, Y., Ingólfsson, H.I., Cheng, X., Lee, J., Marrink, S.J., and Im, W. (2015). CHARMM-GUI Martini Maker  
619 for Coarse-Grained Simulations with the Martini Force Field. *Journal of Chemical Theory and Computation*  
620 *11*, 4486–4494.
- 621 Ranaivoson, F.M., Liu, Q., Martini, F., Bergami, F., Daake, S. von, Li, S., Lee, D., Demeler, B., Hendrickson,  
622 W.A., and Comoletti, D. (2015). Structural and Mechanistic Insights into the Latrophilin3-FLRT3 Complex  
623 that Mediates Glutamatergic Synapse Development. *Structure (London, England : 1993)* *23*, 1665–1677.
- 624 Rolfe, D.J., McLachlan, C.I., Hirsch, M., Needham, S.R., Tynan, C.J., Webb, S.E.D., Martin-Fernandez,  
625 M.L., and Hobson, M.P. (2011). Automated multidimensional single molecule fluorescence microscopy  
626 feature detection and tracking. *European Biophysics Journal* *40*, 1167–1186.
- 627 Russ, W.P., and Engelman, D.M. (2000). The GxxxG motif: A framework for transmembrane helix-helix  
628 association. *Journal of Molecular Biology* *296*, 911–919.
- 629 Sando, R., Jiang, X., and Südhof, T.C. (2019). Latrophilin GPCRs direct synapse specificity by coincident  
630 binding of FLRTs and teneurins. *Science* *363*, eaav7969.

- 631 Sarabipour, S., and Hristova, K. (2016). Mechanism of FGF receptor dimerization and activation. *Nat*  
632 *Commun* 7, 10262.
- 633 Seiradake, E., Toro, D. del, Nagel, D., Cop, F., Härtl, R., Ruff, T., Seyit-Bremer, G., Harlos, K., Border, E.C.,  
634 Acker-Palmer, A., et al. (2014). FLRT structure: balancing repulsion and cell adhesion in cortical and  
635 vascular development. *Neuron* 84, 370–385.
- 636 Seiradake, E., Jones, E.Y., and Klein, R. (2016). Structural Perspectives on Axon Guidance. *Annual Review*  
637 *of Cell and Developmental Biology* 32, 577–608.
- 638 Sharpe, H.J., Stevens, T.J., and Munro, S. (2010). A Comprehensive Comparison of Transmembrane  
639 Domains Reveals Organelle-Specific Properties. *Cell* 142, 158–169.
- 640 Sonntag, Y., Musgaard, M., Olesen, C., Schiøtt, B., Møller, J.V., Nissen, P., and Thøgersen, L. (2011).  
641 Mutual adaptation of a membrane protein and its lipid bilayer during conformational changes. *Nat Commun*  
642 2, 304.
- 643 Souza, P.C.T., Alessandri, R., Barnoud, J., Thallmair, S., Faustino, I., Grünewald, F., Patmanidis, I.,  
644 Abdizadeh, H., Bruininks, B.M.H., Wassenaar, T.A., et al. (2021). Martini 3: a general purpose force field for  
645 coarse-grained molecular dynamics. *Nat Methods* 1–7.
- 646 Stone, M.B., Shelby, S.A., and Veatch, S.L. (2017). Super-Resolution Microscopy: Shedding Light on the  
647 Cellular Plasma Membrane. *Chemical Reviews* 117, 7457–7477.
- 648 Tamagaki, H., Furukawa, Y., Yamaguchi, R., Hojo, H., Aimoto, S., Smith, S.O., and Sato, T. (2014). Coupling  
649 of transmembrane helix orientation to membrane release of the juxtamembrane region in FGFR3.  
650 *Biochemistry* 53, 5000–5007.
- 651 Teese, M.G., and Langosch, D. (2015). Role of GxxxG Motifs in Transmembrane Domain Interactions.  
652 *Biochemistry* 54, 5125–5135.
- 653 Toro, D. del, Ruff, T., Cederfjäll, E., Villalba, A., Seyit-Bremer, G., Borrell, V., and Klein, R. (2017). Regulation  
654 of Cerebral Cortex Folding by Controlling Neuronal Migration via FLRT Adhesion Molecules. *Cell* 169, 621-  
655 635.e16.
- 656 Toro, D. del, Carrasquero-Ordaz, M.A., Chu, A., Ruff, T., Shahin, M., Jackson, V.A., Chavent, M., Berbeira-  
657 Santana, M., Seyit-Bremer, G., Brignani, S., et al. (2020). Structural Basis of Teneurin-Latrophilin Interaction  
658 in Repulsive Guidance of Migrating Neurons. *Cell* 180, 323-339.e19.
- 659 Tusnady, G.E., and Simon, I. (2001). The HMMTOP transmembrane topology prediction server.  
660 *Bioinformatics (Oxford, England)* 17, 849–850.
- 661 Walters, R.F.S., and DeGrado, W.F. (2006). Helix-packing motifs in membrane proteins. *Proceedings of the*  
662 *National Academy of Sciences of the United States of America* 103, 13658–13663.
- 663 Wassenaar, T.A., Pluhackova, K., Moussatova, A., Sengupta, D., Marrink, S.J., Tieleman, D.P., and  
664 Böckmann, R.A. (2015a). High-Throughput Simulations of Dimer and Trimer Assembly of Membrane  
665 Proteins. The DAFT Approach. *Journal of Chemical Theory and Computation* 11, 2278–2291.
- 666 Wassenaar, T.A., Ingólfsson, H.I., Böckmann, R.A., Tieleman, D.P., and Marrink, S.J. (2015b).  
667 Computational Lipidomics with insane: A Versatile Tool for Generating Custom Membranes for Molecular  
668 Simulations. *Journal of Chemical Theory and Computation* 11, 2144–2155.
- 669 Webb, B., and Sali, A. (2016). Comparative Protein Structure Modeling Using MODELLER. *Curr Protoc*  
670 *Bioinform* 54, 561–5637.
- 671 Webb, S.E.D., Needham, S.R., Roberts, S.K., and Martin-Fernandez, M.L. (2006). Multidimensional single-  
672 molecule imaging in live cells using total-internal-reflection fluorescence microscopy. *Optics Letters* 31,  
673 2157–2159.
- 674 Wheldon, L.M., Haines, B.P., Rajappa, R., Mason, I., Rigby, P.W., and Heath, J.K. (2010). Critical Role of  
675 FLRT1 Phosphorylation in the Interdependent Regulation of FLRT1 Function and FGF Receptor Signalling.  
676 *PLoS One* 5, e10264.
- 677 Wilmes, S., Hafer, M., Vuorio, J., Tucker, J.A., Winkelmann, H., Löchte, S., Stanly, T.A., Prieto, K.D.P.,  
678 Poojari, C., Sharma, V., et al. (2020). Mechanism of homodimeric cytokine receptor activation and  
679 dysregulation by oncogenic mutations. *Science* 367, 643–652.
- 680 Yamagishi, S., Hampel, F., Hata, K., Toro, D. del, Schwark, M., Kvachnina, E., Bastmeyer, M., Yamashita,  
681 T., Tarabykin, V., Klein, R., et al. (2011). FLRT2 and FLRT3 act as repulsive guidance cues for Unc5-positive  
682 neurons. *The EMBO Journal* 30, 2920–2933.



683 Zanetti-Domingues, L.C., Korovesis, D., Needham, S.R., Tynan, C.J., Sagawa, S., Roberts, S.K., Kuzmanic,  
684 A., Ortiz-Zapater, E., Jain, P., Roovers, R.C., et al. (2018). The architecture of EGFR's basal complexes  
685 reveals autoinhibition mechanisms in dimers and oligomers. *Nature Communications* 9, 4325.

686

## 687 **Acknowledgements**

688 A.L.D. is supported by the BBSRC grant BB/R00126X/1 and Pembroke College, Oxford (BTP  
689 Fellowship). E.Y.J. was funded by UK Medical Research Council programme grant G9900061.  
690 The Wellcome Centre for Human Genetics is supported by Wellcome Trust Centre grant  
691 203141/Z/16/Z. E.S. is funded by the Wellcome Trust (202827/Z/16/Z), EMBO YIP and supported  
692 by the COST action 'Adhere'n Rise'. V.A.J was funded by the Wellcome Trust DPhil programme  
693 in Cellular Structural Biology. M.S.P.S. is funded by Wellcome Trust grants WT092970MA and  
694 208361/Z/17/Z. M. C. is supported by the CNRS-MITI grant "Modélisation du vivant" 2020. This  
695 work was granted access to the HPC resources of CALMIP supercomputing center under the  
696 allocation 2020-17036. The single molecule analysis used computing resources provided by STFC  
697 Scientific Computing Department's SCARF cluster. We acknowledge Life Science Editors for  
698 proofreading the manuscript. M. C. thanks E. Haanappel and A. Atkinson for fruitful discussions  
699 and support.

700

## 701 **Authors contributions:**

702 Conceptualization: ACK, MSPS, ES, MLMF, MC

703 Methodology: CTJ, DJR, RAC, AC

704 Investigation: VJ, CJT, DJR, RAC, ALD, MN, AC, MC

705 Supervision: ACK, MSPS, MLMF, ES, MC

706 Writing—original draft: VJ, JH, CJT, DJR, MSPS, MLMF, ES, MC

707 Writing—review & editing: CJT, DJR, RAC, ALD, ACK, EYJ, MSPS, MLMF, ES, MC

708

709 **Competing interests:** The authors declare that they have no competing interests.

710

711 **Data and materials availability:** Scripts used to analyze MD simulations and models for the main  
712 conformations both in coarse grained and atomistic representations are available at:  
713 <https://github.com/MChavent/FLRT> . Additional data related to this paper may be requested from  
714 the authors.

715

716
